# Supplementary material for: Development of a comprehensive set of tools for genome engineering in a cold- and thermo-tolerant Kluyveromyces marxianus yeast strain
Source: PubMed Central journal article supplement (PMC5566861; doi:10.1038/s41598-017-08356-5), 2017-08-21
Supplement: 41598_2017_8356_MOESM1_ESM.pdf [file 41598_2017_8356_MOESM1_ESM.pdf]

## Supplementary Information

### **Development of a comprehensive set of tools for genome engineering in a cold- and thermo-tolerant *Kluyveromyces marxianus* yeast strain**

Yumiko Nambu-Nishida<sup>1,2</sup>, Keiji Nishida<sup>3</sup>, Tomohisa Hasunuma<sup>3</sup>, Akihiko Kondo<sup>2,3,4,\*</sup>

<sup>1</sup>Technology Research Association of Highly Efficient Gene Design (TRAHED), 7-1-49 Minatojimaminamimachi, Chuo-ku, Kobe 650-0047, Japan

<sup>2</sup>Department of Chemical Science and Engineering, Graduate School of Engineering, Kobe University, 1-1 Rokkodai-cho, Nada-ku, Kobe, Hyogo 657-8501, Japan

<sup>3</sup>Graduate School of Science, Technology and Innovation, Kobe University, 1-1 Rokkodai-cho, Nada-ku, Kobe, Hyogo 657-8501, Japan

<sup>4</sup> Biomass Engineering Program, RIKEN, 1-7-22 Suehiro-cho, Tsurumi-ku, Yokohama, Kanagawa 230-0045, Japan

\*[akondo@kobe-u.ac.jp](mailto:akondo@kobe-u.ac.jp)

AAGCTAGCTCTAGATGCCGCAAATAGGGCAGGCGATATACAAGGCGGTATACAGGGCGGTATACAAGGCG  
TATGCCAGACGGTATGCCTGGAGGCATTGTCAGGAGGCATTGTCAGGAGGCATTGCCGGCGAAATCGCC  
AGCTTGAGTATGGCCCCAGAGGGAAGAAAAACAGTTACCCAGGTGTGTGCCCTGTATTACCCTGACTT  
TGAAATGTACGCGAAGTACACTTCGTGCAGGGTGATGATGCTCGTATCAGGTGGACTTGGCGGACACGGT  
ACGGTACGGTCCCCTTTTTTATTTTTCTTTTGGGAATGAGAAGGCCACGTGACGTTACCCTGGCCCTG  
TGTTTCCCCCTCGCATCTTGTACTGCCTTAGGACCCCTCGTAGTGTAGCGGTCCGGGCCCCAGATTGC  
GATGTGTTTCGAGAAAAACAACAAAAAATAAGTTGAAAAGCGCGGATCAGGCGGTCCGCCCGGAGTGC  
GCGCGCTGATTCTCGCCTGACAGGGCGGGATTCGCAACGTCCGCAGTTCGAATCNNNNNNNNNNNNNNN  
NNNNNGTTTTAGAGCTAGAAATAGCAAGTAAAATAAGGCTAGTCCGTTATCAACTTGAAAAAGTGGCAC  
CGAGTCGGTGGTGCTTTTTTGTTTTTTATCACTAGTATGCGGCCGCGAATTCAGG

Supplementary Figure S1 - Sequence of target-containing sgRNA cassette.

“N” indicates target specific sequence. This sequence indicates as follows: Purple: KmP<sub>SNR52</sub>, Gray: sgRNA, Green: Sup4 terminator.

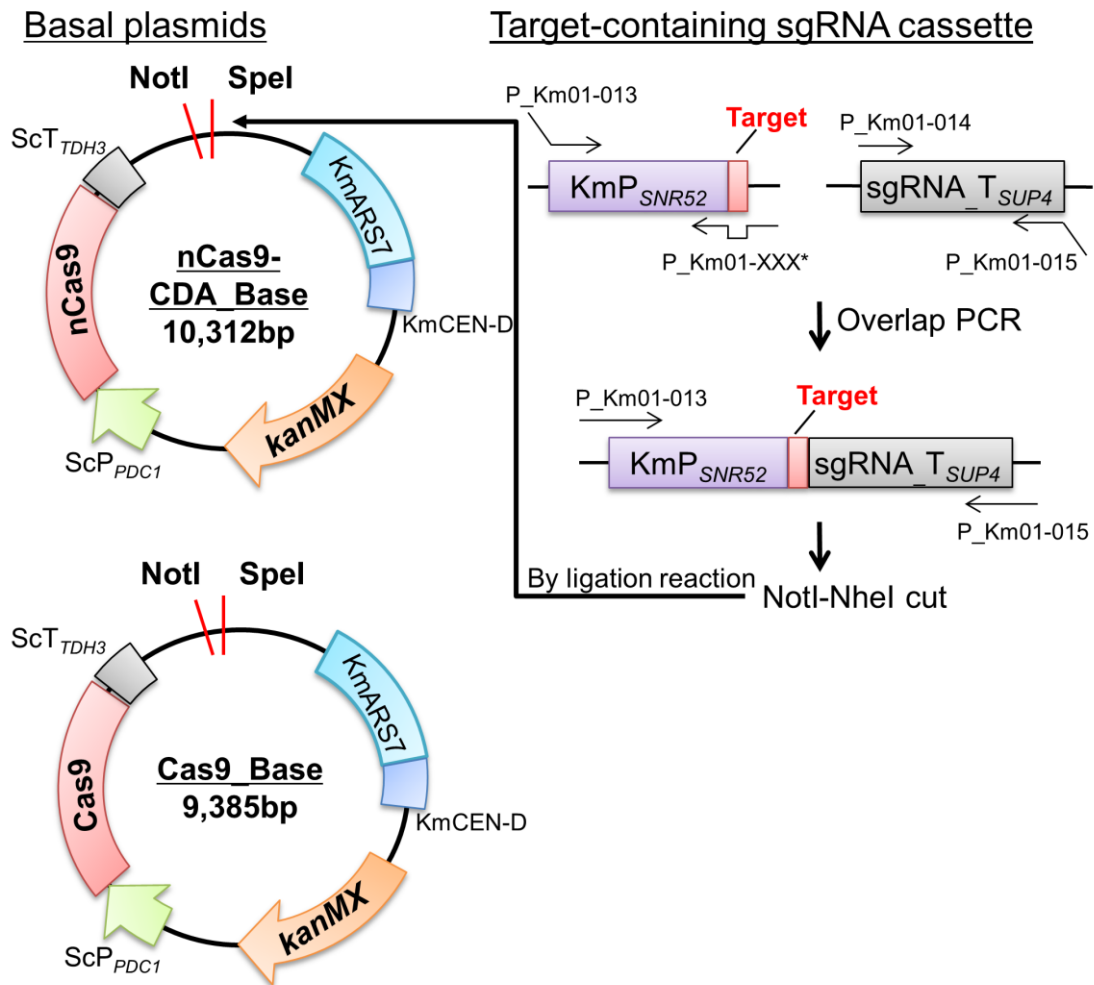

Supplementary Figure S2 - Construction of genome-editing plasmids.

Constructed basal plasmids nCas9-CDA\_Base and Cas9\_Base are shown on the left. Target-containing sgRNA cassettes were constructed by overlap PCR using target sequence-containing primers (P\_Km01-XXX, where XXX was a 3-digit number as shown in the figure) and then inserted into the basal plasmids at NotI and SpeI/NheI restriction enzyme sites.

AAAAATGAAGTTTTAAATCAATCTAAAGTATATATGAGTAACTTGGTCTGACAGTTACCAATGCTTAAT  
CAGTGAGGCACCTATCTCAGCGATCTGTCTATTTGTTTCATCCATAGTTGCCTGACTCCCCGTCGTGTAG  
ATAACTACGATACGGGAGGGCTTACCATCTGGCCCCAGTGCTGCAATGATACCGCGAGAACCACGCTCAC  
CGGCTCCAGATTTATCAGCAATAAACAGCCAGCCGGAAGGGCCGAGCGCAGAAGTGGTCTGCAACTTT  
ATCCGCCTCCATCCAGTCTATTAATTGTTGCCGGGAAGCTAGAGTAAGTAGTTCGCCAGTTAATAGTTTG  
CGCAACGTTGTTGCCATTGCTACAGGCATCGTGGTGTACGCTCGTCGTTTGGTATGGCTTCATTCAGCT  
CCGGTCCCAACGATCAAGGCGAGTTACATGATCCCCATGTTGTGCAAAAAGCGGTTAGCTCCTTCGG  
TCCTCCGATCGTTGTGAGAAGTAAGTTGGCCGAGTGTATCACTCATGGTTATGGCAGCACTGCATAAT  
TCTCTTACTGTCATGCCATCCGTAAGATGCTTTTCTGTGACTGGTACTCAACCAAGTCATTCTGAG  
AATAGTGTATGCGGCGACCGAGTTGCTCTTGCCCGCGTCAATACGGGATAATACCGCGCCACATAGCAG  
AACTTTAAAAGTGCTCATCATTGGAAAACGTTCTTCGGGGCGAAAACCTCAAGGATCTTACCGCTGTTG  
AGATCCAGTTCGATGTAACCCACTCGTGCACCAACTGATCTTCAGCATCTTTACTTTCACCAGCGTTT  
CTGGGTGAGCAAAAACAGGAAGGCAAAATGCCGCAAAAAGGAATAAGGGCGACACGGAAATGTTGAAT  
ACTCATACTCTTCTTTTTCAATATTATTGAAGCATTATCAGGGTATTGTCTCATGAGCGGATACATA  
TTTGAATGTATTTAGAAAAATAAACAAATAGGGTTCCGCGTTAATTAAT TGAGATAAGCACACTGCACC  
CATACTTCTTAAAAACGTAGCTTCCAGTTTTTGGTGGTTCGGCTTCTTCCCGATTCCGCCCGCTAA  
ACGCATATTTTTGTTGCCTGGTGGCATTGCAAAATGCATAACCTATGCATTTAAAGATTATGTATGCT  
CTTCTGACTTTTCGTGTGATGAGGCTCGTGGAAAAATGAATAATTTATGAATTTGAGAACAATTTGTG  
TTGTTACGGTATTTTACTATGGAATAATCAATCAATTGAGGATTTTATGCAAATATCGTTTGAATATTTT  
TCCGACCTTTGAGTACTTTTCTTATAATTGCATAATATTGTCCGCTGCCCTTTTTCTGTTAGACGGT  
GTCTTGATCTACTTGCTATCGTTCAACACCACCTATTTTCTAACTATTTTTTTTTTAGCTCATTGAAT  
CAGCTTATGGTATGGCACATTTTTGCATAAACCTAGCTGCCTCGTTGAACATAGGAAAAAAAAATATA  
TAAACAAGGCTCTTCACTCTCCTTGCAATCAGATTTGGGTTTGTCCCTTTATTTTCATATTTCTTGTC  
ATATTCTTTCTCAATTATTATTTTCTACTCATAACCTCAGCAAAATAACACAGTCAAATCAATCAAAG  
CTAGCGAAATGGCACCGAAGAAGAAGCGTAAAGTCGGAATCCACGGAGTTCCTGCGGCAATGGACAAGAA  
GTACTCCATTGGGCTCGATATCGGCACAAACAGCGTCGGTGGGCCGTCATTACGGACGAGTACAAGGTG  
CCGAGCAAAAATTCAAAGTTCTGGGCAATACCGATCGCCACAGCATAAAGAAGAACCTCATTGGCGCCC  
TCCTGTTGACTCCGGGGAGACGGCCGAAGCCACGCGCTCAAAGAACAGCACGGCGCAGATATACCCG  
CAGAAAGAATCGGATCTGCTACCTGCAGGAGATCTTTAGTAATGAGATGGCTAAGGTGGATGACTCTTC  
TTCCATAGGCTGGAGGAGTCCTTTTTGGTGGAGGAGGATAAAAAGCACGAGCGCCACCCAATCTTTGGCA  
ATATCGTGGACGAGGTGGCGTACCATGAAAAGTACCCAACCATATATCATCTGAGGAAGAAGCTTGTAGA  
CAGTACTGATAAGGCTGACTTGCGGTTGATCTATCTCGCGCTGGCGCATATGATCAAATTTCCGGGACAC

TTCTCATCGAGGGGGACCTGAACCCAGACAACAGCGATGTCGACAACTCTTTATCCAACGGTTCAGA  
CTTACAATCAGCTTTTTCGAAGAGAACCCGATCAACGCATCCGGAGTTGACGCCAAAGCAATCCTGAGCGG  
TAGGCTGTCCAAATCCCGGGGCTCGAAAACCTCATCGCACAGCTCCCTGGGGAGAAGAAGAACGGCCTG  
TTTGGTAATCTTATCGCCCTGTCACTCGGGCTGACCCCAACTTTAAATCTAACTTCGACCTGGCCGAAG  
ATGCCAAGCTTCAACTGAGCAAAGACACCTACGATGATGATCTCGACAATCTGCTGGCCAGATCGGCCA  
CCAGTACGCAGACCTTTTTTTGGCGGCAAAGAACCTGTCAGACGCCATTCTGCTGAGTGATATTCTGCGA  
GTGAACACGGAGATCACCAAAGCTCCGCTGAGCGCTAGTATGATCAAGCGCTATGATGAGCACCACCAAG  
ACTTGACTTTGCTGAAGGCCCTTGTGAGACAGCAACTGCCTGAGAAGTACAAGGAAATTTTCTCGATCA  
GTCTAAAAATGGCTACGCCGGATACATTGACGGCGGAGCAAGCCAGGAGGAATTTACAAATTTATTAAG  
CCCATCTTGGAAAAATGGACGGCACCGAGGAGCTGCTGGTAAAGCTTAACAGAGAAGATCTGTTGCGCA  
AACAGCGCACTTTCGACAATGGAAGCATCCCCACCAGATTCACCTGGGCGAACTGCACGCTATCCTCAG  
GCGGCAAGAGGATTTCTACCCCTTTTGAAGATAACAGGAAAAGATTGAGAAAATCCTCACATTTGCG  
ATACCCTACTATGTAGGCCCCCTCGCCCGGGGAAATTCAGATTCGCGTGGATGACTCGCAAATCAGAAG  
AGACCATCACTCCCTGGAACCTCGAGGAAGTCGTGGATAAGGGGGCCTCTGCCAGTCTTCATCGAAAG  
GATGACTAACTTTGATAAAAAATCTGCCTAACGAAAAGGTGCTTCCTAACACTCTCTGCTGTACGAGTAC  
TTCACAGTTTATAACGAGCTCACCAAGGTCAAATACGTCACAGAAGGGATGAGAAAGCCAGCATTCTGT  
CTGGAGAGCAGAAGAAAGCTATCGTGGACCTCCTCTTCAAGACGAACCGGAAAGTTACCGTGAAACAGCT  
CAAAGAAGACTATTTCAAAAAGATTGAATGTTTCGACTCTGTTGAAATCAGCGGAGTGGAGGATCGCTTC  
AACGCATCCCTGGGAACGTATCACGATCTCCTGAAAATCATTAAAGACAAGGACTTCCTGGACAATGAGG  
AGAACGAGGACATTCTTGAGGACATTGTCCTCACCCTTACGTTGTTTGAAGATAGGGAGATGATTGAAGA  
ACGCTTGAAAACCTACGCTCATCTCTTCGACGACAAAGTCATGAAACAGCTCAAGAGGGCGCGATATACA  
GGATGGGGGCGGCTGTCAAGAAAACCTGATCAATGGGATCCGAGACAAGCAGAGTGAAAGACAATCCTGG  
ATTTTCTTAAGTCCGATGGATTTGCCAACCGGAACTTCATGCAGTTGATCCATGATGACTCTCTCACCTT  
TAAGGAGGACATCCAGAAAGCACAAGTTTCTGGCCAGGGGACAGTCTTACGAGCACATCGCTAATCTT  
GCAGGTAGCCCAGCTATCAAAAAGGGAATACTGCAGACCGTTAAGGTCGTGGATGAACTCGTCAAAGTAA  
TGGGAAGGCATAAGCCCGAGAATATCGTTATCGAGATGGCCCGAGAGAACCAAACCTACCCAGAAGGGACA  
GAAGAACAGTAGGGAAAGGATGAAGAGGATTGAAGAGGGTATAAAGAAGCTGGGGTCCCAAATCCTTAAG  
GAACACCCAGTTGAAAACACCCAGCTTCAGAATGAGAAGCTCTACCTGTACTACCTGCAGAACGGCAGGG  
ACATGTACGTGGATCAGGAACTGGACATCAATCGGCTCTCCGACTACGACGTGGATCATATCGTGCCCA  
GTCTTTTCTCAAAGATGATTCTATTGATAATAAAGTGTGACAAGATCCGATAAAAAATAGAGGGAAGAGT  
GATAACGTCCCCTCAGAAGAAGTTGTCAAGAAAATGAAAATTATTGGCGGCAGCTGCTGAACGCCAAAC  
TGATCACACAACGGAAAGTTCGATAATCTGACTAAGGCTGAACGAGGTGGCCTGTCTGAGTTGGATAAAGC

CGGCTTCATCAAAAGGCAGCTTGTGAGACACGCCAGATCACCAAGCACGTGGCCCAAATTCTCGATTCA  
CGCATGAACACCAAGTACGATGAAAATGACAACTGATTCGAGAGGTGAAAGTTACTCTGAAGTCTA  
AGCTGGTCTCAGATTTAGAAAAGGACTTTCAGTTTTATAAGGTGAGAGAGATCAACAATTACCACCATGC  
GCATGATGCCTACCTGAATGCAGTGGTAGGCACTGCACTTATCAAAAAATATCCCAAGCTTGAATCTGAA  
TTTGTTTACGGAGACTATAAAGTGTACGATGTTAGGAAAATGATCGCAAAGTCTGAGCAGGAAATAGGCA  
AGGCCACCGCTAAGTACTTCTTTTACAGCAATATTATGAATTTTTCAAGACCGAGATTACACTGGCCAA  
TGGAGAGATTCGGAAGCGACCACTTATCGAAACAAACGGAGAAACAGGAGAAATCGTGTGGGACAAGGGT  
AGGGATTTTCGCGACAGTCCGGAAGGTCCTGTCCATGCCGCAGGTGAACATCGTTAAAAAGACCGAAGTAC  
AGACCGGAGGCTTCTCCAAGGAAAAGTATCCTCCCGAAAAGGAACAGCGACAAGCTGATCGCACGCAAAAA  
AGATTGGGACCCCAAGAAATACGGCGGATTCGATTCTCCTACAGTCGTTACAGTGTACTGGTTGTGGCC  
AAAGTGGAGAAAAGGAAGTCTAAAAACTCAAAGCGTCAAGGAACTGCTGGGCATCACAATCATGGAGC  
GATCAAGCTTCGAAAAAACCCCATCGACTTCTCGAGGCCGAAAGGATATAAAGAGGTCAAAAAAGACCT  
CATCATTAAAGCTTCCCAAGTACTCTCTTTGAGCTTGAAAACGGCCGAAACGAATGCTCGCTAGTGCG  
GGCGAGCTGCAGAAAAGGTAACGAGCTGGCACTGCCCTCTAAATACGTTAATTTCTGTATCTGGCCAGCC  
ACTATGAAAAGCTCAAAGGGTCTCCCGAAGATAATGAGCAGAAGCAGCTGTTCTGGAACAACACAAACA  
CTACCTTGATGAGATCATCGAGCAAATAAGCGAATTCTCCAAAAGAGTGATCCTCGCCGACGCTAACCTC  
GATAAGGTGCTTTCTGCTTACAATAAGCACAGGGATAAGCCATCAGGGAGCAGGCAGAAAACATTATCC  
ACTTGTTTACTCTGACCAACTTGGGCGCGCTGCAGCCTCAAGTACTTCGACACCACCATAGACAGAAA  
GCGGTACACCTCTACAAAAGGAGGTCCTGGACGCCACACTGATTCATCAGTCAATTACGGGGCTCTATGAA  
ACAAGAATCGACCTCTCTCAGCTCGGTGGAGACAGCAGGGCTGACCCCAAGAAGAAGAGGAAGGTGGCAT  
GCATCCAGGCTAGCGTGAATTTACTTTAAATCTTGCAATTAATAAATTTTCTTTTTATAGCTTTATGAC  
TTAGTTTCAATTTATATACTATTTAATGACATTTTCGATTCATTGATTGAAAGCTTTGTGTTTTTTCTT  
GATGCGCTATTGCATTGTTCTTGTCTTTTTCGCCACATGTAATATCTGTAGTAGATACCTGATACATTGT  
GGATGCTGAGTGAAATTTTAGTTAATAATGGAGGCGCTCTTAATAATTTGGGGATATTGGCTTTTTTT  
TTAAAGTTTACAAATGAATTTTTTCCGCCAGGATGCGGCCGCTCTAGACTAGTCCTAGGGGATCCGTCAC  
CCGGCCAGCGGAATTCAGGGATGATCTTGAGAAGTTCTTAGAGTCTTACGAGGGAACAGAAGATTTGGAA  
CCAGCCAAAGCTGCTATAGCGGAAGCAGATATTTTGCTAAGTAAATGATTAATAATTAATATGTGGAA  
ATACATTAATCTTTTTATATTTTTGCAGTTCGTTGTCGCTATAATTTATAGTCATCTCGTTAGTTCAAAC  
AAGACTTCTGAAGTGAAAACCACTTTCAGTCTTCAAATAAAAAATGAAAATCAGTGAAGAAGGTAA  
CGACTTCATGTTATATATGAATTGAATAGTAATGAAAATAACCAAAAACAGCTCAACAGAAAACAAACAA  
AATACGTTAAGACCTGAACTCCTAGCAGAACCATAACTGCCAAATATTTATTATCTGTGGAGATCTTATA  
TTCTAAAACCAAAAAAATAAATTAAGTAAAAAGAAGATGTTCTAACTGAGGTTCGAACTCAGGA

CCTTTGCCGTGTGAAGGCAACGTGATAGCCACTACACTATTAGAACTACCTTATGGGAAAAGAAAATA  
GAGTACAAGTGAATGGTAAGATCTGTGACCTTTTCTAAACACTTAATTCCATATAGACAGTCCACCC  
ACCATAAGGTCACAATTATAATGTCTTTAGAAGACCACTGTCGTTTCATCATCTTCTAAGCCCTCTCT  
AAAGCGGCATATTTCCGTAATTTGTTCTTCTTTGCACAGGCACGTGAGATGACTCCGATTATCCCACAT  
GCATATTTAGCCTCTCTAGGGGCTCGAGCTATAGCAAGTCAAGGAAAGAAAAGTATTATGATCTGGTCA  
CGTGATAAAAATTTATTAATTTTAAAACTATATAATTTATTATTTTTATTTTAAAGTTTAAAGTAATT  
TTAATAGTATTCTATATTTTAAATAAACATACTTTAAAAATTTATTTAATAATTTATTATTTTTAAATAC  
AATGTTTTTATTTAAAAACAAAATTATAAGTTAAAAAGTTGTTCCGAAAGTAAAATATATTTTATAGGACG  
TCGACATGGAGGCCAGAATACCCTCCTTGACAGTCTTGACGTGCGCAGCTCAGGGGCATGATGTGACTG  
TCGCCGTACATTTAGCCCATACATCCCCATGTATAATCATTGTCATCCATACATTTTGATGGCCGCACG  
GCGGAAGCAAAAATTACGGCTCCTCGCTGCAGACCTGCGAGCAGGAAACGCTCCCCTCACAGACGCGT  
TGAATTGTCCCACGCCGCCCTGTAGAGAAATATAAAAGGTTAGGATTTGCCACTGAGGTTCTTCTT  
TCATATACTTCCTTTTAAAACTTGCTAGGATACAGTTCTCACATCACATCCGAACATAAACAACCATGG  
GTAAGGAAAAGACTCACGTTTTGAGGCCGCGATTAAATCCAACATGGATGCTGATTTATATGGGTATAA  
ATGGGCTCGCGATAATGTGGGCAATCAGGTGCGACAATCTATCGATTGTATGGGAAGCCCGATGCGCCA  
GAGTTGTTTCTGAAACATGGCAAAGGTAGCGTTGCCAATGATGTTACAGATGAGATGGTCAGACTAACT  
GGCTGACGGAATTTATGCCTCTTCCGACCATCAAGCATTTTATCCGTAATCCTGATGATGCATGGTTACT  
CACCCTGCGATCCCCGGCAAAACAGCATTCCAGGTATTAGAAGAATATCCTGATTCAGGTGAAAATATT  
GTTGATGCGCTGGCAGTGTTCCTGCGCCGTTGCATTGATTCTGTTTGTAAATTGCTTTTAAACAGCG  
ATCGCGTATTTGCTCTCGCTCAGGCGCAATCACGAATGAATAACGGTTTGGTTGATGCGAGTGATTTGA  
TGACGAGCGTAATGGCTGGCCTGTTGAACAAGTCTGAAAAGAAATGCATAAGCTTTTGCATTCTCACCG  
GATTCAGTCGTCACCTCATGGTGATTTCTCACTTGATAACCTTATTTTTGACGAGGGGAAATTAATAGGTT  
GTATTGATGTTGGACGAGTCGGAATCGCAGACCGATACCAGGATCTTGCCATCCTATGGAAGTGCCTCGG  
TGAGTTTTCTCCTTCATTACAGAAACGGCTTTTTTCAAAAATATGGTATTGATAATCCTGATATGAATAAA  
TTGCAGTTTCATTTGATGCTCGATGAGTTTTTCTAATCAGTACTGACAATAAAAAGATTCTTGTTTTCAA  
GAACTTGTCATTTGTATAGTTTTTTTATATTGTAGTTGTTCTATTTTAAATCAAATGTTAGCGTGATTTAT  
ATTTTTTTTTCGCTCGACATCATCTGCCAGATGCGAAGTTAAGTGCGCAGAAAGTAAATATCATGCGTCA  
ATCGTATGTGAATGCTGGTCGCTATACTGCTAGGCCGGCCATAGGATAACAGGGTAATGTTAACCAGG  
TTTTCCATAGGCTCCGCCCCCTGACGAGCATCACAAAATCGACGCTCAAGTCAGAGGTGGCGAAACCC  
GACAGGACTATAAAGATACCAGGGTTTTCCCCCTGGAAGCTCCCTCGTGCCTCTCCTGTTCCGACCCTG  
CCGTTACCGGATACCTGTCCGCCTTTCTCCCTCGGGAAGCGTGGCGCTTTCATAGCTCACGCTGTA  
GGTATCTCAGTTCGGTGTAGGTCGTTCCGCTCCAAGCTGGGCTGTGTGCACGAACCCCCCGTTACGCCGA

CCGCTGCGCCTTATCCGGTAACTATCGTCTTGAGTCCAACCCGGTAAGACACGACTTATCGCCACTGGCA  
GCAGCCACTGGTAACAGGATTAGCAGAGCGAGGTATGTAGGCGGTGCTACAGAGTTCTTGAAGTGGTGGC  
CTAACTACGGCTACACTAGAAGGACAGTATTTGGTATCTGCGCTCTGCTGAAGCCAGTTACCTTCGGAAA  
AAGAGTTGGTAGCTCTTGATCCGGCAAACAAACCACCGCTGGTAGCGGTGGTTTTTTTTGTTTGAAGCAG  
CAGATTACGGCAGAAAAAAGGATCTCAAGAAGATCCTTTGATCTTTTCTACGGGTCTGACGCTCAGT  
GGAACGAAAACTCACGTTAAGGGATTTTGGTCATGAGATTATCAAAAAGGATCTTCACCTAGATCCTTTT  
AAATT

Supplementary Figure S3 - Sequence of Cas9\_Base plasmid.

Light green: ScP<sub>PDC1</sub>, Red: Cas9 protein, Gray: ScT<sub>TDH3</sub>, Cyan: KmARS7, Green:  
KmCEN-D, Yellow: *kanMX*



AAAAATGAAGTTTTAAATCAATCTAAAGTATATATGAGTAACTTGGTCTGACAGTTACCAATGCTTAAT  
CAGTGAGGCACCTATCTCAGCGATCTGTCTATTTGTTTCATCCATAGTTGCCTGACTCCCCGTCGTGTAG  
ATAACTACGATACGGGAGGGCTTACCATCTGGCCCCAGTGCTGCAATGATACCGCGAGAACCACGCTCAC  
CGGCTCCAGATTTATCAGCAATAAACAGCCAGCCGGAAGGGCCGAGCGCAGAAGTGGTCTGCAACTTT  
ATCCGCCTCCATCCAGTCTATTAATTGTTGCCGGGAAGCTAGAGTAAGTAGTTCGCCAGTTAATAGTTTG  
CGCAACGTTGTTGCCATTGCTACAGGCATCGTGGTGTACGCTCGTCGTTTGGTATGGCTTCATTCAGCT  
CCGGTCCCAACGATCAAGGCGAGTTACATGATCCCCATGTTGTGCAAAAAGCGGTTAGCTCCTTCGG  
TCCTCCGATCGTTGTGAGAAGTAAGTTGGCCGAGTGTATCACTCATGGTTATGGCAGCACTGCATAAT  
TCTCTTACTGTCATGCCATCCGTAAGATGCTTTTCTGTGACTGGTACTCAACCAAGTCATTCTGAG  
AATAGTGTATGCGGCGACCGAGTTGCTCTTGCCCGCGTCAATACGGGATAATACCGCGCCACATAGCAG  
AACTTTAAAAGTGCTCATCATTGGAAAACGTTCTTGGGGCGAAAACCTCAAGGATCTTACCGCTGTTG  
AGATCCAGTTCGATGTAACCCACTCGTGCACCAACTGATCTTCAGCATCTTTACTTTCACCAGCGTTT  
CTGGGTGAGCAAAAACAGGAAGGCAAAATGCCGCAAAAAGGAATAAGGGCGACACGGAAATGTTGAAT  
ACTCATACTCTTCTTTTTCAATATTATTGAAGCATTATCAGGGTATTGTCTCATGAGCGGATACATA  
TTTGAATGTATTTAGAAAAATAAACAAATAGGGTTCCGCGTAAATTAATTGAGATAAGCACACTGCACC  
CATACTTCTTAAAAACGTAGCTTCCAGTTTTTGGTGGTTCGGCTTCTTCCCGATTCCGCCCGCTAA  
ACGCATATTTTGTGCTGGTGGCATTGCAAAATGCATAACCTATGCATTTAAAGATTATGTATGCT  
CTTCTGACTTTTCGTGTGATGAGGCTCGTGGAAAAATGAATAATTTATGAATTTGAGAACAATTTGTG  
TTGTTACGGTATTTTACTATGGAATAATCAATCAATTGAGGATTTTATGCAAATATCGTTTGAATATTTT  
TCCGACCTTTGAGTACTTTTCTTATAATTGCATAATATTGTCCGCTGCCCTTTTTCTGTTAGACGGT  
GTCTTGATCTACTTGCTATCGTTCAACACCACCTATTTTCTAACTATTTTTTTTTTAGCTCATTGAAT  
CAGCTTATGGTATGGCACATTTTGCATAAACCTAGCTGCCTCGTTGAACATAGGAAAAAAAAATATA  
TAAACAAGGCTCTTCACTCTCCTTGAATCAGATTTGGGTTTGTCCCTTTATTTTCATATTTCTTGTC  
ATATTCTTTCTCAATTATTATTTTCTACTCATAACCTCAGCAAAATAACACAGTCAAATCAATCAAAG  
CTAGCGAAATGGCACCGAAGAAGAAGCGTAAAGTCGGAATCCACGGAGTTCCTGCGGCAATGGACAAGAA  
GTACTCCATTGGGCTCGCTATCGGCACAAACAGCGTCGGTGGGCCGTCATTACGGACGAGTACAAGGTG  
CCGAGCAAAAATTCAAAGTTCTGGGCAATACCGATCGCCACAGCATAAAGAAGAACCTCATTGGCGCC  
TCCTGTTGACTCCGGGGAGACGGCCGAAGCCACGCGCTCAAAGAACAGCACGGCGCAGATATACCCG  
CAGAAAGAATCGGATCTGCTACCTGCAGGAGATCTTTAGTAATGAGATGGCTAAGGTGGATGACTCTTC  
TTCCATAGGCTGGAGGAGTCCTTTTTGGTGGAGGAGGATAAAAAGCACGAGCGCCACCCAATCTTTGGCA  
ATATCGTGGACGAGGTGGCGTACCATGAAAAGTACCAACCATATATCATCTGAGGAAGAAGCTTGTAGA  
CAGTACTGATAAGGCTGACTTGCAGTTGATCTATCTCGCGCTGGCGCATATGATCAAATTTCCGGGACAC

TTCTCATCGAGGGGGACCTGAACCCAGACAACAGCGATGTCGACAACTCTTTATCCAACGGTTCAGAC  
CTTACAATCAGCTTTTTCGAAGAGAACCCGATCAACGCATCCGGAGTTGACGCCAAAGCAATCCTGAGCGC  
TAGGCTGTCCAAATCCCGGGGCTCGAAAACCTCATCGCACAGCTCCCTGGGGAGAAGAAGAACGGCCTG  
TTTGGTAATCTTATCGCCCTGTCACTCGGGCTGACCCCAACTTTAAATCTAACTTCGACCTGGCCGAAG  
ATGCCAAGCTTCAACTGAGCAAAGACACCTACGATGATGATCTCGACAATCTGCTGGCCAGATCGGCCA  
CCAGTACGCAGACCTTTTTTTGGCGGCAAAGAACCTGTCAGACGCCATTCTGCTGAGTGATATTCTGCGA  
GTGAACACGGAGATCACCAAAGCTCCGCTGAGCGCTAGTATGATCAAGCGCTATGATGAGCACCACCAAG  
ACTTGACTTTGCTGAAGGCCCTTGTGAGACAGCAACTGCCTGAGAAGTACAAGGAAATTTTCTTCGATCA  
GTCTAAAAATGGCTACGCCGGATACATTGACGGCGGAGCAAGCCAGGAGGAATTTACAAATTTATTAAG  
CCCATCTTGAAAAAATGGACGGCACCGAGGAGCTGCTGGTAAAGCTTAACAGAGAAGATCTGTTGCGCA  
AACAGCGCACTTTCGACAATGGAAGCATCCCCACCAGATTCACCTGGGCGAACTGCACGCTATCCTCAG  
GCGGCAAGAGGATTTCTACCCCTTTTTGAAAGATAACAGGAAAAGATTGAGAAAATCCTCACATTTGCG  
ATACCCTACTATGTAGGCCCCCTCGCCCGGGGAAATTCAGATTCGCGTGGATGACTCGCAAATCAGAAG  
AGACCATCACTCCCTGGAACCTCGAGGAAGTCGTGGATAAGGGGGCCTCTGCCAGTCTTCATCGAAAG  
GATGACTAACTTTGATAAAAAATCTGCCTAACGAAAAGGTGCTTCCTAAACACTCTCTGCTGTACGAGTAC  
TTCACAGTTTATAACGAGCTCACCAAGGTCAAATACGTCACAGAAGGGATGAGAAAGCCAGCATTCTGT  
CTGGAGAGCAGAAGAAAGCTATCGTGGACCTCCTCTTCAAGACGAACCGGAAAGTTACCGTGAAACAGCT  
CAAAGAAGACTATTTCAAAAAGATTGAATGTTTCGACTCTGTTGAAATCAGCGGAGTGGAGGATCGCTTC  
AACGCATCCCTGGGAACGTATCACGATCTCCTGAAAATCATTAAAGACAAGGACTTCCTGGACAATGAGG  
AGAACGAGGACATTCTTGAGGACATTGTCCTCACCCCTACGTTGTTTGAAGATAGGGAGATGATTGAAGA  
ACGCTTGAAAACCTACGCTCATCTCTTCGACGACAAAGTCATGAAACAGCTCAAGAGGGCGCGATATACA  
GGATGGGGGGCGGCTGTCAAGAAAACCTGATCAATGGGATCCGAGACAAGCAGAGTGAAAGACAATCCTGG  
ATTTTCTTAAGTCCGATGGATTTGCCAACCGGAACTTCATGCAGTTGATCCATGATGACTCTCTCACCTT  
TAAGGAGGACATCCAGAAAGCACAAGTTTCTGGCCAGGGGACAGTCTTCACGAGCACATCGCTAATCTT  
GCAGGTAGCCCAGCTATCAAAAAGGGAATACTGCAGACCGTTAAGGTCGTGGATGAACTCGTCAAAGTAA  
TGGGAAGGCATAAGCCCGAGAATATCGTTATCGAGATGGCCCGAGAGAACCAAACTACCCAGAAGGGACA  
GAAGAACAGTAGGGAAAGGATGAAGAGGATTGAAGAGGGTATAAAGAAGTGGGGTCCCAAATCCTTAAG  
GAACACCCAGTTGAAAACACCCAGCTTCAGAATGAGAAGCTCTACCTGTACTACCTGCAGAACGGCAGGG  
ACATGTACGTGGATCAGGAACTGGACATCAATCGGCTCTCCGACTACGACGTGGATCATATCGTGCCCA  
GTCTTTTCTCAAAGATGATTCTATTGATAATAAAGTGTGACAAGATCCGATAAAAAATAGAGGGAAGAGT  
GATAACGTCCCCTCAGAAGAAGTTGTCAAGAAAATGAAAAATTATTGGCGGCAGCTGCTGAACGCCAAAC  
TGATCACACAACGGAAGTTCGATAATCTGACTAAGGCTGAACGAGGTGGCCTGTCTGAGTTGGATAAAGC

CGGCTTCATCAAAAGGCAGCTTGTTGAGACACGCCAGATCACCAAGCACGTGGCCCAAATTCTCGATTCA  
CGCATGAACACCAAGTACGATGAAAATGACAACTGATTCGAGAGGTGAAAGTTACTCTGAAGTCTA  
AGCTGGTCTCAGATTTAGAAAAGGACTTTCAGTTTTATAAGGTGAGAGAGATCAACAATTACCACCATGC  
GCATGATGCCTACCTGAATGCAGTGGTAGGCACTGCACTTATCAAAAAATATCCCAAGCTTGAATCTGAA  
TTTGTTTACGGAGACTATAAAGTGTACGATGTTAGGAAAATGATCGCAAAGTCTGAGCAGGAAATAGGCA  
AGGCCACCGCTAAGTACTTCTTTTACAGCAATATTATGAATTTTTCAAGACCGAGATTACACTGGCCAA  
TGGAGAGATTCGGAAGCGACCACTTATCGAAACAAACGGAGAAACAGGAGAAATCGTGTGGGACAAGGGT  
AGGGATTTGCGGACAGTCCGGAAGGTCCTGTCCATGCCGCAGGTGAACATCGTTAAAAGACCGAAGTAC  
AGACCGGAGGCTTCTCCAAGGAAAAGTATCCTCCCGAAAAGGAACAGCGACAAGCTGATCGCACGCAAAAA  
AGATTGGGACCCCAAGAAATACGGCGGATTCGATTCTCCTACAGTCGTTACAGTGTACTGGTTGTGGCC  
AAAGTGGAGAAAAGGGAAGTCTAAAAACTCAAAGCGTCAAGGAACTGCTGGGCATCACAATCATGGAGC  
GATCAAGCTTCGAAAAAACCCCATCGACTTTCGAGGCGAAAGGATATAAAGAGGTCAAAAAAGACCT  
CATCATTAAAGCTTCCCAAGTACTCTCTTTGAGCTTGAAAACGGCCGAAACGAATGCTCGCTAGTGCG  
GGCGAGCTGCAGAAAGGTAACGAGCTGGCACTGCCCTCTAAATACGTTAATTTCTGTATCTGGCCAGCC  
ACTATGAAAAGCTCAAAGGGTCTCCCGAAGATAATGAGCAGAAGCAGCTGTTCTGGAACAACACAAACA  
CTACCTTGATGAGATCATCGAGCAAATAAGCGAATTCTCCAAAAGAGTGATCCTCGCCGACGCTAACCTC  
GATAAGGTGCTTTCTGCTTACAATAAGCACAGGGATAAGCCCATCAGGGAGCAGGCAGAAAACATTATCC  
ACTTGTTTACTCTGACCAACTTGGGCGCGCTGCAGCCTCAAGTACTTCGACACCACCATAGACAGAAA  
GCGGTACACCTCTACAAAGGAGGTCCTGGACGCCACACTGATTCATCAGTCAATTACGGGGCTCTATGAA  
ACAAGAATCGACCTCTCTCAGCTCGGTGGAGACAGCAGGGCTGACCCCAAGAAGAAGAGGAAGGTGGGTG  
GAGGAGGTACCGGCGGTGGAGGCTCAGCAGAATACGTACGAGCTCTGTTGACTTCAATGGGAATGACGA  
GGAGGATCTCCCCTTAAGAAGGGCGATATTCTCCGCATCAGAGATAAGCCCGAAGAACAATGGTGGAA  
GCCGAGGATAGCGAAGGGAAAAGGGGCATGATTCTGGTGCCATATGTGGAGAAATATTCCGGTGACTACA  
AAGACCATGATGGGGATTACAAAGACCAGACATCGACTACAAAGACGACGACGATAAATCAGGGATGAC  
AGACGCCGAGTACGTGCGCATTATGAGAACTGGATATTTACACCTTCAAGAAGCAGTTCTTCAACAAC  
AAGAAATCTGTGTCACACCGCTGCTACGTGCTGTTTGTGAGTTGAAGCGAAGGGGGCGAAGAAGGGCTTGT  
TTTGGGGCTATGCCGTCAACAAGCCCCAAAGTGGCACCGAGAGAGGAATACACGCTGAGATATTCAGTAT  
CCGAAAAGGTGGAAGAGTATCTTCGGGATAATCCTGGGCAGTTTACGATCAACTGGTATTCCAGCTGGAGT  
CCTTGCGCTGATTGTGCCGAGAAAATTCTGGAATGGTATAATCAGGAACTTCGGGGAAACGGGCACACAT  
TGAAAATCTGGGCCTGCAAGCTGTACTACGAGAAGAATGCCCGAACCAGATAGGACTCTGGAATCTGAG  
GGACAATGGTGTAGGCCTGAACGTGATGGTTTCCGAGCACTATCAGTGTGTCGGAAGATTTTCATCCAA  
AGCTCTCATAACCAGCTCAATGAAAACCGCTGGTTGGAGAAAACACTGAAACGTGCGGAGAAGCGGAGAT

CCGAGCTGAGCATCATGATCCAGGTCAAGATTCTGCATACCACTAAGTCTCCAGCCGTTGGTCCCAAGAA  
GAAAAGAAAAGTCGCATGCATCCAGGCTAGCGTGAATTTACTTTAAATCTTGCATTTAATAAATTTTCT  
TTTTATAGCTTTATGACTTAGTTTCAATTTATATACTATTTAATGACATTTTCGATTCATTGATTGAAA  
GCTTTGTGTTTTTCTTGATGCGCTATTGCATTGTTCTTGTCTTTTTCGCCACATGTAATATCTGTAGTA  
GATACCTGATACATTGTGGATGCTGAGTGAATTTTAGTTAATAATGGAGGCGCTCTTAATAATTTGGG  
GATATTGGCTTTTTTTTTTAAAGTTTACAAATGAATTTTTCCGCCAGGATGCGGCCGCTCTAGACTAGT  
CCTAGGGGATCCGTCACCCGGCCAGCGGAATTCAGGGATGATCTTGAGAAGTTCTTAGAGTCTTACGAGG  
GAACAGAAGATTTGGAACCAGCCAAAGCTGCTATAGCGGAAGCAGATATTTGCTAAGTAAATGATTAA  
TAATTAATATGTGAAAACATTAATCTTTTTATATTTTGCAGTTCGTTGTCGCTATAATTTATAGTC  
ATCTCGTTAGTTCAAACAAGACTTCTTGAAGTAAAACCACTTTCAGTCTTCAAACATAAAATGAAAAT  
CAGTGGAAGAAGGTAAACGACTTCATGTTATATATGAATTGAATAGTAATGGAAATAACCAAAAACAGCT  
CAACAGAAAACAAAACAAAATACGTTAAGACCTGAACTCCTAGCAGAACCATAACTGCCAAATATTTATTA  
TCTGTGGAGATCTTATATTCTAAAACCAAAAAAATAAECTTAAAAGTAAAAAGAAGATGTTCTAACT  
GAGGTTCGAACTCAGGACCTTTGCCGTGTGAAGGCAACGTGATAGCCACTACACTATTAGAACTACCTTA  
TGGGAAAAAGAAAAATAGAGTACAACAGAAATGGTAAGATCTGTGACCTTTCTAAACACTTAATTCAT  
ATAGACAGTTCACCCACCATAAGGTCACAATTATAATGTCTTTAGAAGACCACTGTCGTTTCATCATCT  
TCCTAAGCCCTCTCTCTAAAGCGGCATATTTCCGTAATTTGTTCTTTGCACAGGCACGTGAGATGAC  
TCCGATTATTCCACATGCATATTTAGCCTCTCTAGGGGCTCGAGCTATAGCAAGTCAAGGAAAGAAAA  
CTATTATGATCTGGTCACGTGTATAAAAATTTATTAATTTTAAACTATATAATTTATTTTTTTATTT  
TAAAGTTTAAAGTAATTTAATAGTATTCTATATTTTAAATAAACATACTTTAAAATTTATTTAATAAT  
TTATTTTTTTAAATACAATGTTTTATTTAAAACAAAATTATAAGTTAAAAGTTGTTCCGAAAGTAAA  
ATATATTTTATAGGACGTCGACATGGAGGCCAGAATACCCTCCTTGACAGTCTTGACGTGCGCAGCTCA  
GGGGCATGATGTGACTGTCGCCCCGTACATTTAGCCCATACATCCCATGTATAATCATTTGCATCCATAC  
ATTTTGATGGCCGACGGCGGAAGCAAAAATTACGGCTCCTCGCTGCAGACCTGCGAGCAGGGAAACGC  
TCCCCTCACAGACGCGTTGAATTGTCCCACGCCGCGCCCCTGTAGAGAAATATAAAAGGTTAGGATTTG  
CCTAGAGGTTCTTCTTTTATATACTTCTTTTTAAAATCTTGCTAGGATACAGTCTCACATCACATCCG  
AACATAAACAACCATGGGTAAAGAAAAGACTCACGTTTCGAGGCCGCGATTAATTTCCAACATGGATGCT  
GATTTATATGGGTATAAATGGGCTCGCGATAATGTCGGGCAATCAGGTGCGACAATCTATCGATTGTATG  
GGAAGCCCGATGCGCCAGAGTTGTTTCTGAAACATGGCAAAGGTAGCGTTGCCAATGATGTTACAGATGA  
GATGGTCAGACTAACTGGCTGACGGAATTTATGCCTCTCCGACCATCAAGCATTTTATCCGTACTCCT  
GATGATGCATGGTACTCACCCTGCGATCCCCGGCAAAACAGCATTCCAGGTATTAGAAGAATATCCTG  
ATTCAGGTGAAAATATTGTTGATGCGCTGGCAGTGTTCCTGCGCCGTTGCATTTCGATTCCTGTTGTAA

TTGTCCTTTTAAACAGCGATCGCGTATTTTCGTCTCGCTCAGGCGCAATCACGAATGAATAACGGTTTGGTT  
GATGCGAGTGATTTTATGATGACGAGCGTAATGGCTGGCCTGTTGAACAAGTCTGAAAGAAATGCATAAGC  
TTTTGCCATTCTCACCGGATTCAGTCGTCACTCATGGTGATTTCTCACTTGATAACCTTATTTTTGACGA  
GGGAAATTAATAGGTTGTATTGATGTTGGACGAGTCGGAATCGCAGACCGATACCAGGATCTTGCCATC  
CTATGGAAGTGCCTCGGTGAGTTTTCTCCTTCATTACAGAAACGGCTTTTTCAAAAATATGGTATTGATA  
ATCCTGATATGAATAAATTGCAGTTTCATTGATGCTCGATGAGTTTTCTAATCAGTACTGACAATAAA  
AAGATTCTTGTTCAGAACTTGCATTTGTATAGTTTTTTTATATTGTAGTTGTTCTATTTTAATCAA  
ATGTTAGCGTGATTTATTTTTTTTTCGCCTCGACATCATCTGCCAGATGCGAAGTTAAGTGCAGCAA  
AGTAATATCATGCGTCAATCGTATGTGAATGCTGGTCGCTATACTGCCTAGGCCGGCCATAGGGATAACA  
GGGTAATGTTAACCGTTTTTCCATAGGCTCCGCCCCCTGACGAGCATCACAAAATCGACGCTCAAGT  
CAGAGGTGGCGAAACCCGACAGGACTATAAAGATACCAGGCGTTTCCCCTGGAAGCTCCCTCGTGGCT  
CTCCTGTTCCGACCCTGCCGCTTACCGGATACCTGTCCGCTTTCTCCCTTCGGAAGCGTGGCGCTTC  
TCATAGCTCAGCTGTAGGTATCTCAGTTCGGTGTAGGTCGTTCCGCTCCAAGCTGGGCTGTGTGCAGAA  
CCCCCGTTCAGCCGACCGCTGGCCTTATCCGGTAACTATCGTCTTGAGTCCAACCCGGTAAGACAGG  
ACTTATCGCCACTGGCAGCAGCCACTGGTAACAGGATTAGCAGAGCGAGGTATGTAGGCGGTGCTACAGA  
GTTCTTGAAGTGGTGGCCTAACTACGGCTACACTAGAAGGACAGTATTTGGTATCTGCGCTCTGCTGAAG  
CCAGTTACCTTCGGAAAAAGAGTTGGTAGCTCTTGATCCGGCAAACAAACCACCGCTGGTAGCGGTGGTT  
TTTTTGTTCGAAAGCAGCAGATTACGCGCAGAAAAAAGGATCTCAAGAAGATCCTTTGATCTTTTCTAC  
GGGGTCTGACGCTCAGTGGAACGAAAACCTCACGTTAAGGGATTTTGGTCATGAGATTATCAAAAAGGATC  
TTCACCTAGATCCTTTTAAATT

Supplementary Figure S4 - Plasmid nCas9-CDA\_Base sequences.

Light green: ScP<sub>PDC1</sub>, Red: nCas9 protein, Gray: ScT<sub>TDH3</sub>, Cyan: KmARS7, Green:  
KmCEN-D, Yellow: *kanMX*

AGCGCCAATACGCAAACCGCCTCTCCCCGCGCGTTGGCCGATTCATTAATGCAGCTGGCACGACAGGTT  
TCCCGACTGGAAAGCGGGCAGTGAGCGCAACGCAATTAATGTGAGTTAGCTCACTCATTAGGCACCCAG  
GCTTTACACTTTATGCTTCCGGCTCGTATGTTGTGTGGAATTGTGAGCGGATAACAATTTACACAGGAA  
ACAGCTATGACCATGATTACGCCAAGCTCAGAATTAACCCTCACTAAAGGGACTAGTCCTGCAGGTTTAA  
ACGAATTCGCCCTTCAGAGAGTCTGCAACACCGATTTATCGGTTTGCAGGTAACACAATACCGATTACTT  
GGTGTCTGAGGAGATCTCAATTCTCTCTTTTTCTTCAACTTTATTTTCTTGGTATGCTTCTTGTGCAT  
TCGCCTATTAATTTATATTAGCGATTCTTATGACATCGGCCATCACTGAGTATAGTGAGTAGTAGTGTT  
GATATTTGAAATCTATTATAGATAAGTTCCTTTACATATCGTGCAGCACTTGTATGTGAAGTATTAGT  
AGCTATATTGGCTATATACAGAGAGAAAAGCTATAACTATTTATATCATAACTGTTTGTATAACTTAACGA  
CCCATGCTTTGGTTCAAAGCAGCGTTTTGCTCTTGGAAACGTTGTCCAACACGTTCACTATGTTTCAAGA  
ACTTTTCTGAGCATTTCATTATGCAGCTTTGCTCCTTGAAGTTAGCTTAGCAGAGGTAAAGTCGTTGAC  
ACAGTCACTGAAACATCTTTGACCAAGTTGGAGTATAGACGCATGAAGTCCTTCATTTGCTTTTGTTC  
ACAATTCTTTGAACTCTTGTGTTCTTACCATTTAGTTGATCCATTTTTAACTGTGTATTTGATTTTT  
TTGTTCTAGCAATCGACGGTCCAAGACTCAATAAAAATTGACTCTTGTATCTTTCTTCACTAGTAGTA  
AAGCAGAAAAGTCTAGCAGAAAATGTGTATCTTTATAACGGTCAATGGTCTAAGAAGCAAGGTTTGGTTCT  
TCGCACTTGTATTAACCTCTTTTTCTTGGTTGTGAAATTCACATAATGTACTTCACCAAAAAACAAAA  
AAAAAAAAAAAAAAAAAAAAATTTTCGGTGCAAAAAACAGCTTCTAGCACGTGACTAACTTGTAGCGTATA  
CAATGTGCGCAATGCCATTACACTCTAACATCTCTGTATAGTTTATATAAACGATCAACTTGTAACTT  
CTGATCCGAGTACACTCGAACCTCTGCTTGTCTCAGTATAGCGACCAGCATTACATACGATTGACGCA  
TGATATTACTTTCTGCGCACTTAACTTCGCATCTGGGCAGATGATGTGAGGCGAAAAAATATAAATC  
ACGCTAACATTTGATTAATAAGAACAACTACAATATAAAAAACTATACAAATGACAAGTTCTTGAAAA  
CAAGAATCTTTTTATTGTCAGTACTGATCATGAGATGCCTGCAAGCAATTCGTTCTGTATCAGGCGCAGG  
AGCGTCCCGTCCGGGTCGACCAAAGCGGCCATCGTGCCTCCCCTCCTGCAGTTCGGGGGCATGGATGC  
GCGGATAGCCGCTGCTGGTTTCTGGATGCCGACGGATTTGCACTGCCGGTAGAACTCCGCGAGGTGCTC  
CAGCCTCAGGCAGCAGCTGAACCAACTCGCGAGGGGATCGAGCCCGGGTGGGCGAAGAACTCCAGCATG  
AGATCCCCGCGCTGGAGGATCATCCAGCCGGCGTCCCGGAAAACGATTCCGAAGCCCAACCTTTCATAGA  
AGGCGGCGGTGGGATCGAAATCTCGTGATGGCAGGTTGGGCGTCGCTTGGTCCGTCATACCCATGCCGGT  
ACCGGATCCCTTGTACAGCTCGTCCATGCCGAGAGTGATCCCGCGGCGGTCACGAACTCCAGCAGGACC  
ATGTGATCGCGCTTCTCGTTGGGGTCTTTGCTCAGGGCGGACTGGGTGCTCAGGTAGTGTTGTGCGGCA  
GCAGCACGGGGCCGTGCGCGATGGGGTGTCTGCTGGTAGTGGTCCGGCAGCTGCACGCTGCCGTCTC  
GATGTTGTGGCGGATCTTGAAGTTCACCTTGATGCCGTTCTTCTGCTTGTGCGCCATGATATAGACGTTG  
TGGCTGTTGTAGTTGTAAGTCCAGCTTGTGCCCCAGGATGTTGCCGTCCTCCTTGAAGTCGATGCCCTCA

GCTCGATGCGGTTACCAGGGTGTGCGCCTCGAACTTCACCTCGGCGCGGGTCTTGTAGTTGCCGTCGTC  
CTTGAAGAAGATGGTGCCTCCTGGACGTAGCCTTCGGGCATGGCGGACTTGAAGAAGTCGTGCTGCTTC  
ATGTGGTGGGGTAGCGGCTGAAGCACTGCACGCCGTAGGTCAGGGTGGTCACGAGGGTGGGCCAGGGCA  
CGGGCAGCTTGCCGGTGGTGCAGATGAACTTCAGGGTCAGCTTGCCGTAGGTGGCATCGCCCTCGCCCTC  
GCGGACACGCTGAACTTGTGGCCGTTTACGTCGCCGTCCAGCTCGACCAGGATGGGCACCACCCCGGTG  
AACAGCTCCTCGCCCTTGCTCACCATGCTAGCTTTGATTGATTGACTGTGTTATTTGCGTGAGGTTAT  
GAGTAGAAAAATAATAATTGAGAAAAGGAATATGACAAGAAATAGAAAATAAAGGGAACAAACCCAAATCT  
GATTGCAAGGAGAGTGAAAGAGCCTTGTTTATATATTTTTTTTTTCTATGTTCAACGAGGACAGCTAGGT  
TTATGCAAAAATGTGCCATCACCATAAGCTGATTCAAATGAGCTAAAAAAAAAATAGTTAGAAAATAAGG  
TGGTGTGAACGATAGCAAGTAGATCAAGACACCGTCTAACAGAAAAAGGGCAGCGGACAATATTATGC  
AATTATGAAGAAAAGTACTCAAAGGGTCGGAAAAATATTCAAACGATATTTGCATAAAATCCTCAATTGA  
TTGATTATTCCATAGTAAAAACCGTAACAACACAAAATTGTTCTCAAATTCATAAATTATTCATTTTT  
CCACGAGCCTCATCACACGAAAAGTCAGAAGAGCATACATAATCTTTAAATGCATAGGTTATGCATTTT  
GCAAAATGCCACCAGGCAACAAAAATATGCGTTTTAGCGGGCGGAATCGGGAAGGAAGCCGGAACCACAAA  
AACTGGAAGCTACGTTTTTAAGGAAGGTATGGGTGCAGTGTGCTTATCTCAAACCTTTGATTAGTTTATGG  
GCTAGCTTATGATACTTCCTCTTGCTGTTCCAGTTTACAAATGATTTAACGAACCTTCTACACTTTTACG  
GTAGTATTTCTTGTGGTGTAGGCTCAGATTCAATATGACTGCTAATCAGTAAAATTAATGGAACA  
GCCAGACACACAGCCTTTGAAAAATGTTAAAAACGATCACATATATGTAGTCACGTGGTTAGTGCATAGA  
GTCAGGCGATGGTGGTTAGTCCCTAGCCAGAGCCATTCCCCTCTTGTTCGAAATGCGATGACTGAATG  
GGGAAGAAGCTCTTAGTATTTCTGTAGTTTTTTTTGCGATTTCTATTGTTGCCTGCCCCGACTTTCTT  
TTACCTTTTGTAGTACAACATTAATTATAATGCATAATAGATCTAGAAGCGTATTGTGATGAGCATCC  
TTGAAATAAGAAAGGAAGTCACAGGTACAGTAAAAAAGAGCCGTGACAGGCACCTAATTTAGTTTTG  
ATTGAGGTATAATGAGCTCAGAAGACCAAGATGCTCTAAAAGTAAAGCAGAATGGTCTTTCCAATCAGAA  
TTCGTCACCTTGTGGTGCCTTAACTGCTGGTGAAGATCTATGGTTTATCAGATGACTTCATTCTATATG  
AGAACTCCACTAAAACTGTTTCGACCGCCAGATTTGACTATACGCATTATATTCGAGTACTGTTGACTG  
GGAGTGATGATACAAATAAGGATTCTAAGGTACGACGTTCAAATATAAGTTTTGGAGTCCCAAATATAC  
ATACTACTTCGAAAATTCCTCCATTGGAATAGTTACTAAGGCACTAAATAAGTATGGGTGGAAGTTATT  
CCTGATAGAATATTGCCTCCTTTGGTGGCAAATTCCTTGCTGGGGTAGTTCTTTATACCACATACTTGA  
CTACCTGAATAATTTCCAGTCAGATCAGTGGAGCCAGTTTTCAACACAATTTGTTTGACTACTTAAG  
GTAAGGGCGAATTCGCGGCCGCTAAATTCAATTCGCCCTATAGTGAGTCGTATTACAATTCAGTGGCCGT  
CGTTTTACAACGTCGTGACTGGGAAAACCTGGCGTTACCCAACCTAATCGCCTTGCAGCACATCCCCCT  
TTCGCCAGCTGGCGTAATAGCGAAGAGGCCCGCACCGATCGCCCTTCCCAACAGTTGCGCAGCCTATACG

TACGGCAGTTTAAGGTTTACACCTATAAAAAGAGAGAGCCGTTATCGTCTGTTTGTGGATGTACAGAGTGA  
TATTATTGACACGCCGGGGGCGACGGATGGTGATCCCCCTGGCCAGTGCACGTCTGCTGTGAGATAAAGTC  
TCCCGTGAACCTTACCCGGTGGTGCATATCGGGGATGAAAGCTGGCGCATGATGACCACCGATATGGCCA  
GTGTGCCGGTCTCCGTTATCGGGGAAGAAGTGGCTGATCTCAGCCACCGCGAAAATGACATCAAAAACGC  
CATTAACTGATGTTCTGGGGAATATAAATGTCAGGCATGAGATTATCAAAAAGGATCTTCACCTAGATC  
CTTTTCACGTAGAAAAGCCAGTCCGCAGAAAACGGTGCTGACCCCGGATGAATGTCAGCTACTGGGCTATCT  
GGACAAGGGAAAACGCAAGCGCAAAGAGAAAAGCAGGTAGCTTGCAGTGGGCTTACATGGCGATAGCTAGA  
CTGGGCGGTTTTATGGACAGCAAGCGAACCAGGAATTGCCAGCTGGGGCGCCCTCTGGTAAGGTTGGGAAG  
CCCTGCAAAGTAAACTGGATGGCTTTCTTGCCGCAAGGATCTGATGGCGCAGGGGATCAAGCTCTGATC  
AAGAGACAGGATGAGGATCGTTTCGCATGATTGAACAAGATGGATTGCACGCAGGTTCTCCGGCCGCTTG  
GGTGGAGAGGCTATTCGGCTATGACTGGGCACAACAGACAATCGGCTGCTCTGATGCCGCCGTGTTCCGG  
CTGTGACGCGCAGGGGCGCCCGTTCTTTTTGTCAAGACCGACCTGTCCGGTGCCCTGAATGAACTGCAAG  
ACGAGGCAGCGCGGCTATCGTGGCTGGCCACGACGGGCGTTCCTTGCGCAGCTGTGCTCGACGTTGTCAC  
TGAAGCGGGAAGGGACTGGCTGCTATTGGGGCAAGTGCCGGGGCAGGATCTCCTGTCATCTCACCTTGCT  
CCTGCCGAGAAAAGTATCCATCATGGCTGATGCAATGCGGCGGCTGCATACGCTTGATCCGGCTACCTGCC  
CATTGACCACCAAGCGAAAACATCGCATCGAGCGAGCACGTACTCGGATGGAAGCCGGTCTTGTCGATCA  
GGATGATCTGGACGAAGAGCATCAGGGGCTCGCGCCAGCCGAACTGTTCCGCCAGGCTCAAGGCGAGCATG  
CCCGACGGCGAGGATCTCGTCTGACCCATGGCGATGCCTGCTTGCCGAATATCATGGTGGAAAATGGCC  
GCTTTTCTGGATTCATCGACTGTGGCCGGCTGGGTGTGGCGGACCGCTATCAGGACATAGCGTTGGCTAC  
CCGTGATATTGCTGAAGAGCTTGGCGGCGAATGGGCTGACCGCTTCCTCGTGCTTTACGGTATCGCCGT  
CCCGATTGCGAGCGCATCGCCTTCTATCGCCTTCTTGACGAGTTCTTCTGAATTATTAACGCTTACAATT  
TCCTGATGCGGTATTTTCTCCTTACGCATCTGTGCGGTATTTACACCCGCATCAGGTGGCACTTTTCCGG  
GAAATGTGCGCGGAACCCCTATTTGTTATTTTTCTAAATACATTCAAATATGTATCCGCTCATGAGATT  
ATCAAAAAGGATCTTCACCTAGATCCTTTAAATTA AAAATGAAGTTTTAAATCAATCTAAAGTATATAT  
GAGTAAACTTGGTCTGACAGTTACCAATGCTTAATCAGTGAGGCACCTATCTCAGCGATCTGTCTATTT  
GTTTCATCCATAGTTGCCTGACTCCCCGTCGTGTAGATAACTACGATACGGGAGGGCTTACCATCTGGCCC  
CAGTGCTGCAATGATACCGGAGAGACCCAGCTCACCAGCTCCAGATTTATCAGCAATAAACCAGCCAGCC  
GGAAGGGCCGAGCGCAGAAGTGGTCCCTGCAACTTTATCCGCCTCCATCCAGTCTATTAATTGTTGCCGGG  
AAGCTAGAGTAAGTAGTTCGCCAGTTAATAGTTTGGCGAACGTTGTTGCCATTGCTACAGGCATCGTGGT  
GTCACGCTCGTCTTTGGTATGGCTTCATTGAGCTCCGGTCCCAACGATCAAGGCGAGTTACATGATCC  
CCCATGTTGTGCAAAAAAGCGGTTAGCTCCTTCGGTCCCTCCGATCGTTGTCAGAAGTAAGTTGGCCGCAG  
TGTTATCACTCATGGTTATGGCAGCACTGCATAATTCTCTTACTGTCATGCCATCCGTAAGATGCTTTTC



TGTGACTGGTGAGTACTCAACCAAGTCATTCTGAGAATAGTGTATGCGGCGACCGAGTTGCTCTTGCCCG  
GCGTCAATACGGGATAATACCGCGCCACATAGCAGAACTTTAAAAGTGCTCATCATTGGAAAACGTTCTT  
CGGGGCGAAAACCTCAAGGATCTTACCGCTGTTGAGATCCAGTTCGATGTAACCCACTCGTGACCCAA  
CTGATCTTCAGCATCTTTTACTTTACCAGCGTTTCTGGGTGAGCAAAAACAGGAAGGCAAAATGCCGCA  
AAAAAGGAATAAGGGCGACACGGAAATGTTGAATACTCATACTCTTCCTTTTTCAATATTATTGAAGCA  
TTTATCAGGGTTATTGTCTCATGACCAAAATCCCTAACGTGAGTTTTCGTTCCACTGAGCGTCAGACCC  
CGTAGAAAAGATCAAAGGATCTTCTTGAGATCCTTTTTTTCTGCGCGTAATCTGCTGCTTGCAAACAAA  
AAACCACCGCTACCAGCGGTGGTTTTGTTTGCCGGATCAAGAGCTACCAACTCTTTTTCCGAAGGTAAGT  
GCTTCAGCAGAGCGCAGATACCAAATACTGTTCTTCTAGTGTAGCCGTAGTTAGGCCACCACTTCAAGAA  
CTCTGTAGCACCGCCTACATACCTCGCTCTGCTAATCCTGTTACCAGTGGCTGCTGCCAGTGGCGATAAG  
TCGTGTCTTACCGGGTTGGACTCAAGACGATAGTTACCGGATAAGGCGCAGCGGTGGGGCTGAACGGGGG  
GTTTCGTGCACACAGCCAGCTTGGAGCGAACGACCTACACCGAACTGAGATACCTACAGCGTGAGCTATG  
AGAAAGCGCCACGCTTCCCGAAGGGAGAAAGGCGGACAGGTATCCGGTAAGCGGCAGGGTCGGAACAGGA  
GAGCGCAGGAGGGAGCTTCCAGGGGGAAACGCCTGGTATCTTTATAGTCCTGTGGGGTTTCGCCACCTCT  
GACTTGAGCGTCGATTTTTGTGATGCTCGTCAGGGGGCGGAGCCTATGGAAAACGCCAGCAACGCGGC  
CTTTTTACGGTTCCTGGCCTTTTGCTGGCCTTTTGCTCACATGTTCTTTCTGCGTTATCCCCTGATTCT  
GTGGATAACCGTATTACCGCCTTTGAGTGAGCTGATACCGCTCGCCGAGCCGAACGACCGAGCGCAGCG  
AGTCAGTGAGCGAGGAAGCGGAAG

Supplementary Figure S5 - Plasmid TOPO/F7 sequences.

**Yellow**: bleomycin gene, **Cyan**: GFP coding sequence, **Green**: ScP<sub>PDC1</sub>

Supplementary Table S1 - Primers used in this study

| Primer name                                       | Sequence (5'-3')                                           | Purpose                                              |
|---------------------------------------------------|------------------------------------------------------------|------------------------------------------------------|
| Universal primers for sgRNA cassette construction |                                                            |                                                      |
| P_Km01_013(pKmSNR52_Fw)                           | aagctagctctagaTGCCGCAAATAGGGCAGG                           | amplification of P <sub>KmSNR52</sub> region         |
| P_Km01_014(tracerRNA_Fw)                          | GTTTTAGAGCTAGAAATAGCAAG                                    | amplification of tracrRNA_T <sub>sup4</sub> fragment |
| P_Km01_015(tracerRNA_Rv)                          | cctgaattcGCGGCCGCatactagtCATAAAAAACAAAA<br>AAAGCACCACC     | amplification of tracrRNA_T <sub>sup4</sub> fragment |
| Target-specific primers                           |                                                            |                                                      |
| P_Km01_016(single1(NEJ1)_Fw)                      | CTAGCTCTAAAACCTTATTATCAGTATTTGTAG<br>ATTCGAACTGCGGACGTTG   | amplification of target <i>NEJ1</i>                  |
| P_Km01_017(single2(DNL4)_Fw)                      | CTAGCTCTAAAACTCTCCAGAGTTTAAATGGTT<br>GATTCGAACTGCGGACGTTG  | amplification of target <i>Dnl4</i>                  |
| P_Km01_018(deletion1(Ura3)_Fw)                    | CTAGCTCTAAAACCCTTTGATTAGTTTATGGGCG<br>ATTCGAACTGCGGACGTTG  | amplification of target Ura3_Fw                      |
| P_Km01_019(deletion2(Ura3)_Rv)                    | CTAGCTCTAAAACAGAACAAGCAGAGGTTCTGA<br>GGATTCGAACTGCGGACGTTG | amplification of target Ura3_Rv                      |
| P_Km01_059(deletion2(Sed1)_Fw)                    | CTAGCTCTAAAACCTGGAATAGAACTGGATGTG<br>GATTCGAACTGCGGACGTTG  | amplification of target <i>Sed1-2</i>                |

Primer pairs for insert donor DNA

|                             |                                                                           |                                                                                                                                        |
|-----------------------------|---------------------------------------------------------------------------|----------------------------------------------------------------------------------------------------------------------------------------|
| P_Km01_039(Ura3(5)_Fw)      | ACCTTAAGTAGTCAAACAAATTGTG                                                 | amplification of GFP and bleomycin expression donor DNA containing length of 1000 bp <i>Ura3</i> homologous sequence (donor DNA-I)     |
| P_Km01_046(Ura3(3)_Rv)      | CAGAGAGTCTGCAACACCGA                                                      |                                                                                                                                        |
| Ura3_up_100F                | TGAATCTGAGCTCATCACCAAC                                                    | amplification of GFP and bleomycin expression donor DNA containing length of 122/109 bp <i>Ura3</i> homologous sequence (donor DNA-II) |
| Ura3_down100_R              | GTATACAATGTGCGCAATGCC                                                     |                                                                                                                                        |
| P_Km01_052(Ble_GFP_50bp_Rv) | TGGAACAGCAAGAGGAAGTATC                                                    | amplification of GFP expression donor DNA containing length of 50 bp <i>Ura3</i> homologous sequence (donor DNA-III)                   |
| P_Km01_053(GFP_50bp_Fw)     | GATCAACTTGTA ACTTCTGATCCGAGTACACTC<br>GAACCTCTGCTTGTCTgatccctgtacagctcgtc |                                                                                                                                        |
| P_Km01_060(GFP_Sed1_Fw)     | TATTCGTGGTACCAGTTTTATTTGCATCATCTGC<br>ATTTGCTGCTTTCTCTatggtagcaagggcga    | amplification of GFP codin region donor DNA containing length of 50 bp <i>Sed1</i> homologous sequence (donor DNA-IV)                  |
| P_Km01_061(GFP_Sed1_Rv)     | gaaGATGGGGCAACTGAGGTCACtACTGGAATAG<br>AACTGGATGTGTCGTTaccctgtacagctcgtcca |                                                                                                                                        |
| P_Km01_052(Ble_GFP_50bp_Rv) | TGGAACAGCAAGAGGAAGTATC                                                    | amplification of $P_{PDC1}$ region donor DNA containing length of 50 bp homologous sequence (donor DNA-V)                              |
| P_Km01_064(pPDC1_Fw)        | atgggcaccaccccggtgaa                                                      |                                                                                                                                        |
| P_Km01_065(EGFP_Rv)         | GCTAGCatggtagcaaggg                                                       | amplification of GFP coding region donor                                                                                               |

|                             |                                                                           |                                                                                                                          |
|-----------------------------|---------------------------------------------------------------------------|--------------------------------------------------------------------------------------------------------------------------|
| P_Km01_066(EGFP_Fw)         | AACTATACAAATGACAAGTTCTTGAAAACAAG<br>AATCTTTTTATTGTCAGTgatccctgtacagctcgtc | DNA containing length of 50 bp homologous<br>sequence (donor DNA-VI)                                                     |
| P_Km01_051(Ble_GFP_50bp_Fw) | GATCAACTTGTA ACTTCTGATCCG                                                 | amplification of T <sub>TEF1</sub> region donor DNA<br>containing length of 50 bp homologous<br>sequence (donor DNA-VII) |
| P_Km01_067(TEF1t_Rv)        | ACTGACAATAAAAAGATTCTTGT                                                   |                                                                                                                          |

Red indicates each target sequence.
